# Supplementary material for: An intrinsic electrical conductivity study of perovskite powders MAPbX3 (X = I, Br, Cl) to investigate its effect on their photovoltaic performance
Source: Royal Society of Chemistry journal article supplement (doi:10.1039/d3cp05686d), 2024-01-01
Supplement: d3cp05686d1.pdf [file d3cp05686d1.pdf]

## Intrinsic electric conductivity study of perovskite powders MAPbX<sub>3</sub> (X = I, Br, Cl) to investigate its effect on the photovoltaic performance.

Shafi Ullah<sup>1,\*</sup>, Andreu Andrio<sup>2</sup>, Julia Mari-Guaita<sup>1</sup>, Hanif Ullah<sup>3</sup>, Antonio Méndez-Blas<sup>4</sup>, Roxana M. del Castillo Vázquez<sup>5</sup>, Bernabé Mari<sup>1</sup>, Vicente Compañ<sup>6,\*</sup>

<sup>1</sup>Instituto de diseño y Fabricación (IDF). Universitat Politècnica de València (UPV), Camino de Vera, s/n, 46022 Valencia, Spain.

<sup>2</sup>Departamento de Física Aplicada. Universitat Jaume I. Avda. Sos Baynat, s/n, 12080-Castellón de la Plana.

<sup>3</sup>Department of Electrical Engineering, Federal Urdu University (FUUAST) Islamabad, Pakistan.

<sup>4</sup>Instituto de Física, Benemérita Universidad Autónoma de Puebla, Apartado Postal J-48, Puebla, 72570, México.

<sup>5</sup>Departamento de Física, Facultad de Ciencias. Universidad Nacional Autónoma de México (UNAM). México D.F.

<sup>6</sup>Departamento de Termodinámica Aplicada (ETSII), Universitat Politècnica de València, Camino de Vera s/n, 46022 Valencia, Spain.

\*Corresponding authors. [vicommo@ter.upv.es](mailto:vicommo@ter.upv.es) and [Shafi399@yahoo.com](mailto:Shafi399@yahoo.com);

Figures SI1, SI2, SI3, SI4, SI5 and SI6.

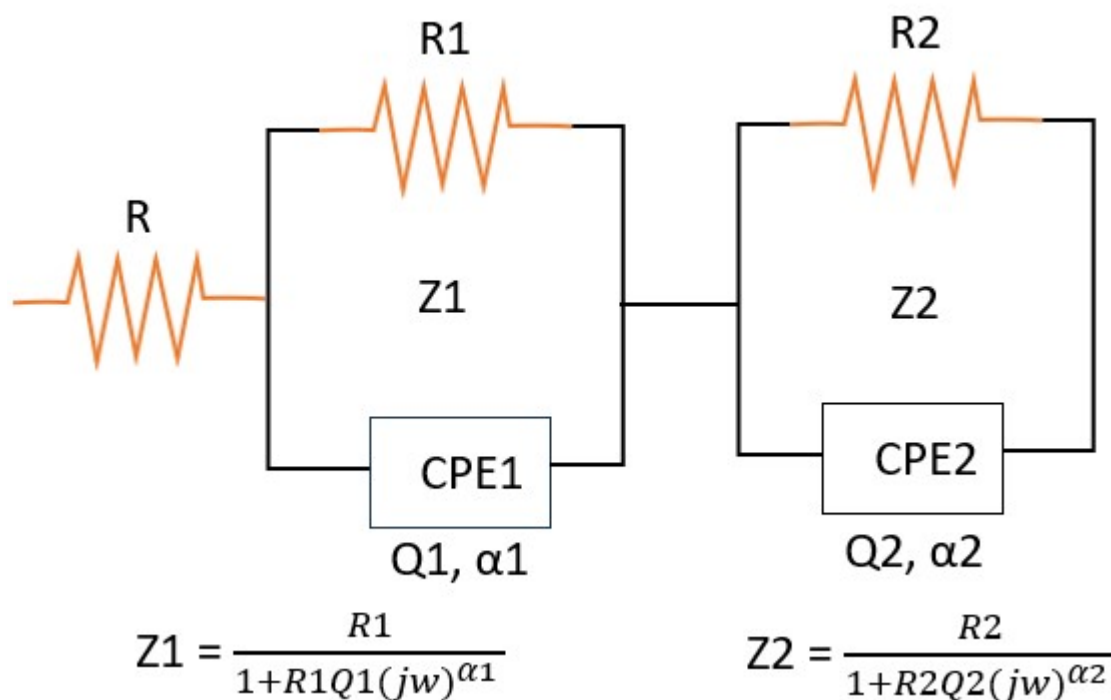

**Figure SI1.** The equivalent circuit formed by a parallel combination of two resistance and constant phase element impedance (R1–CPE1) and (R2–CPE2) circuits associated in series.

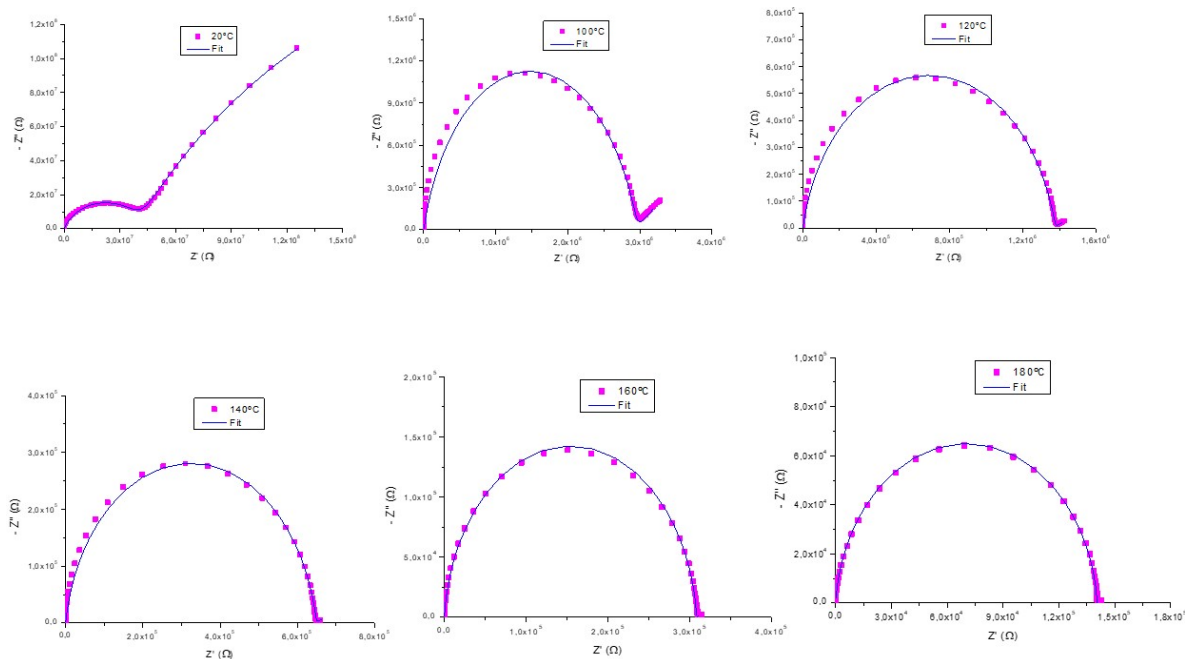

**Figure SI2.** Nyquist plots representing the complex impedance vs. real part of the impedance, at various temperatures (20°C, 100°C, 120°C, 140°C, 160°C and 180°C) for the MAPbBr<sub>3</sub>.

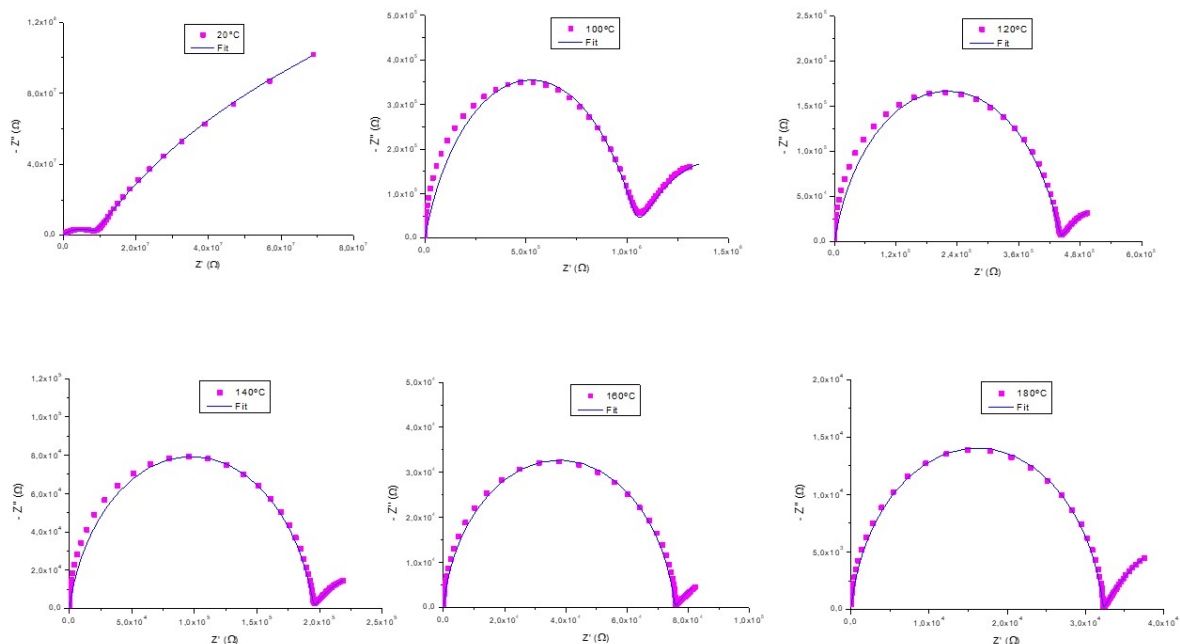

**Figure SI3.** Nyquist plots representing the complex impedance vs. real part of the impedance, at various temperatures (20°C, 100°C, 120°C, 140°C, 160°C and 180°C) for the MAPbCl<sub>3</sub>.

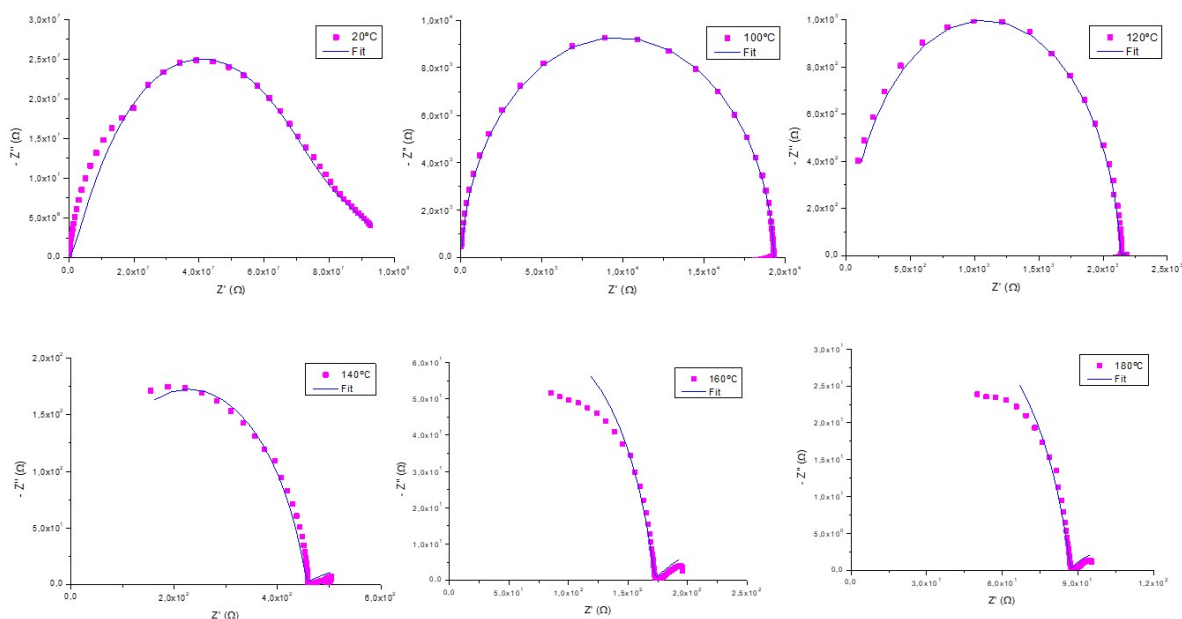

**Figure SI4.** Nyquist plots representing the complex impedance vs. real part of the impedance, at various temperatures (20°C, 100°C, 120°C, 140°C, 160°C and 180°C) for the MAPbI<sub>3</sub>.

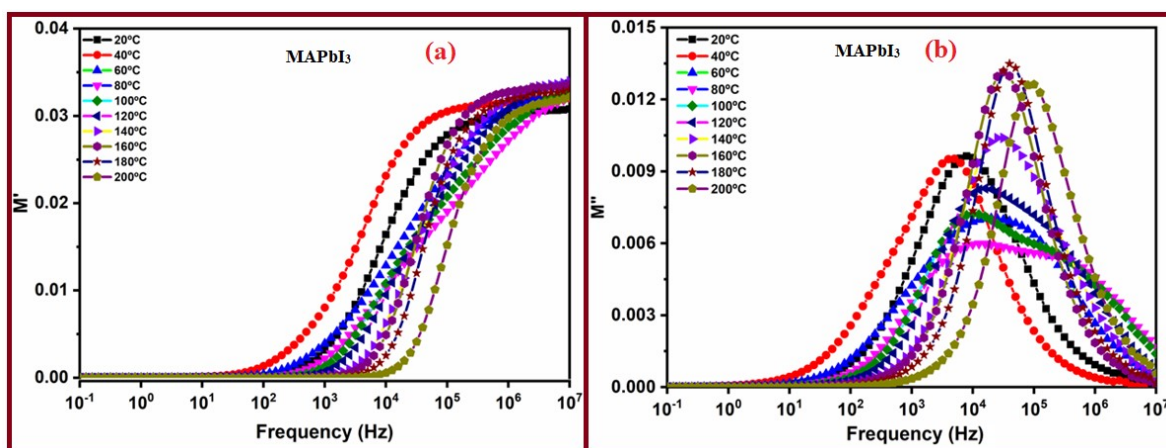

**Figure SI5.** Real part  $M'$  (a) and imaginary part  $M''$  of the complex dielectric modulus as a function of the frequency measured at different temperatures for the perovskite MAPbI<sub>3</sub>.

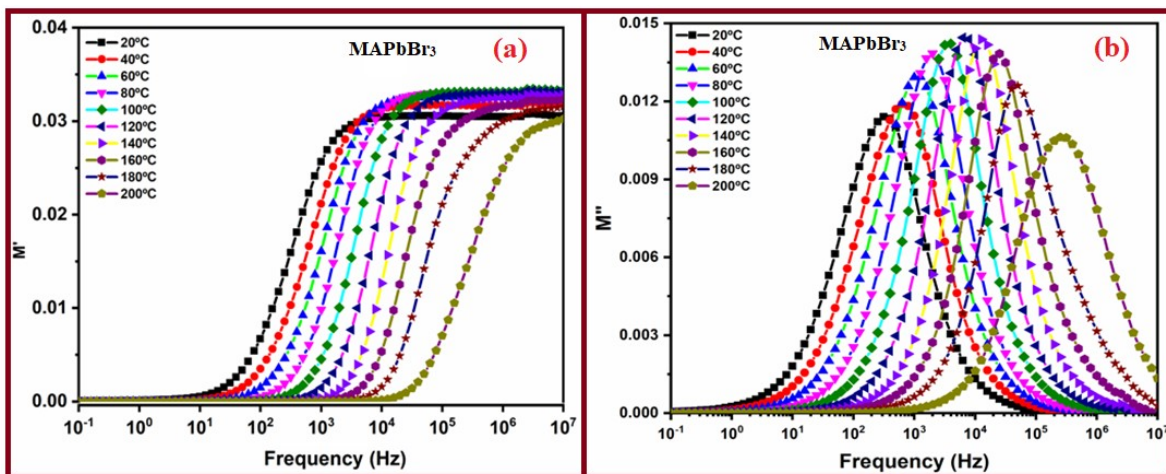

**Figure SI6.** Real part  $M'$  (a) and imaginary part  $M''$  of the complex dielectric modulus as a function of the frequency measured at different temperatures for the perovskite MAPbBr<sub>3</sub>.
